# Supplementary material
Source: MDPI journal article supplement (https://www.mdpi.com/2076-3417/11/9/3975)
Supplement: s1 [file s1]

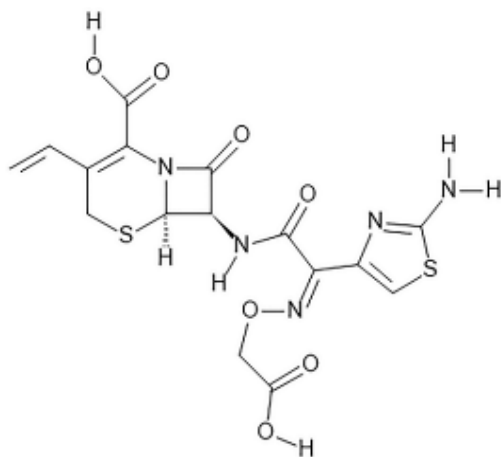

Fig. S1 Chemical formula of the antibiotic Cefixime.

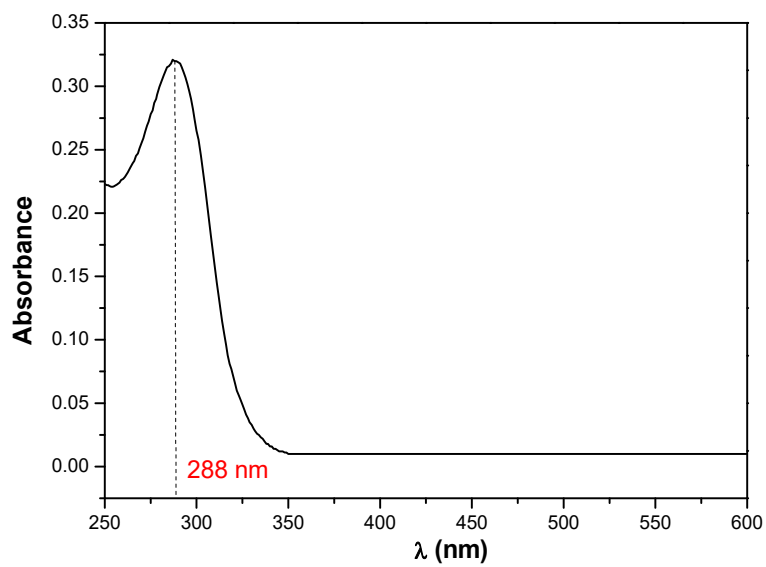

Fig. S2 UV-visible spectra of Cefixime (10 mg/L).

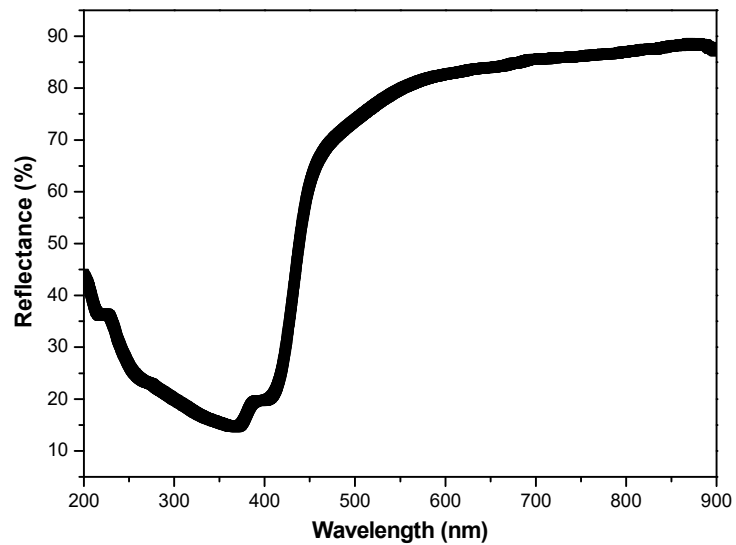

Fig. S3 UV-visible spectrum of ZnBi<sub>2</sub>O<sub>4</sub>.

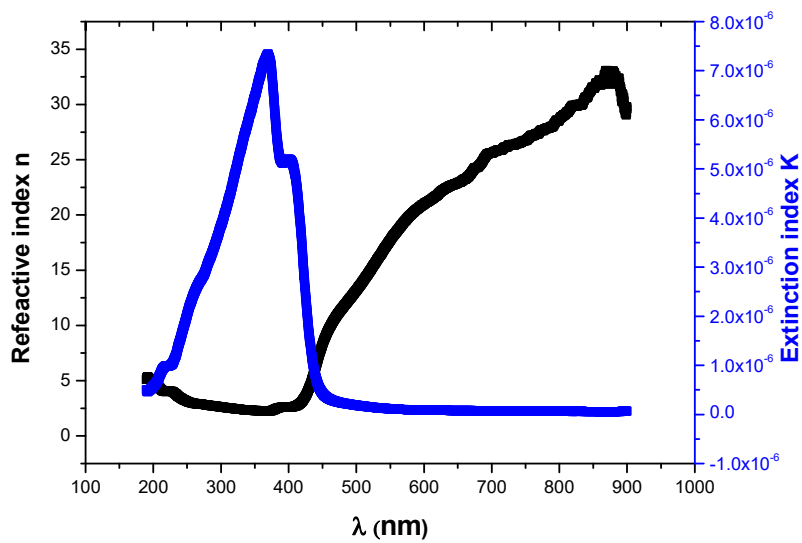

Fig. S4 Spectral distribution of  $n(\lambda)$  and  $K(\lambda)$ .

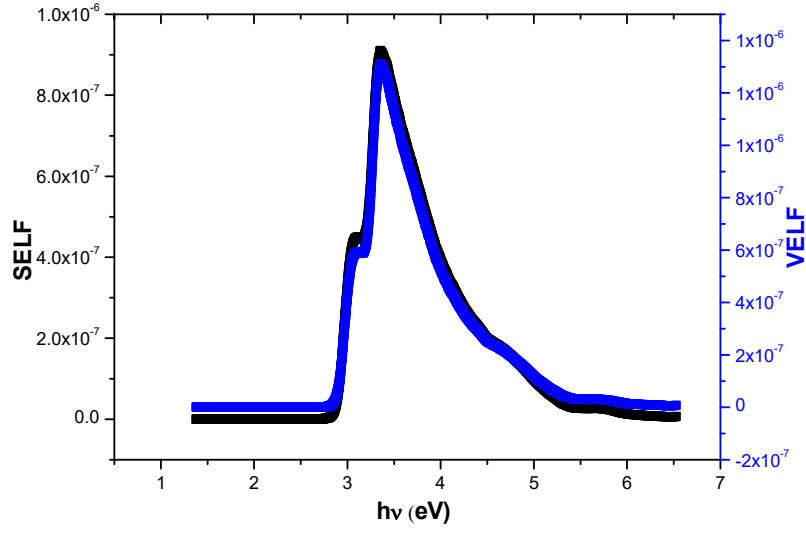

Fig. S5 Variation of SELF and VELF as a function of the energy ( $h\nu$ ).

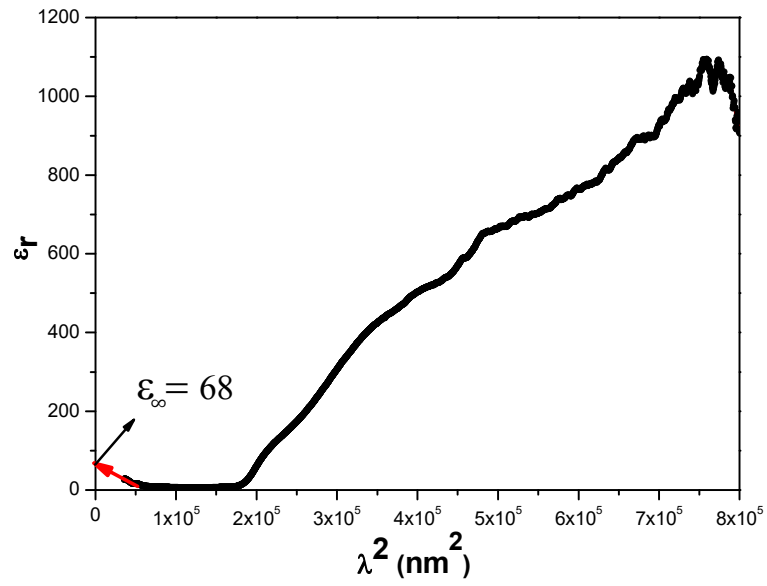

Fig. S6  $\epsilon_r$  as function of  $\lambda^2$ .

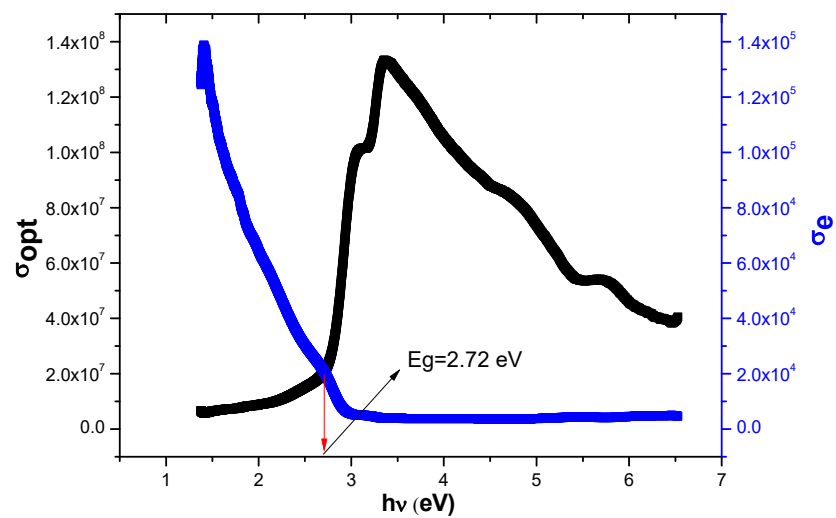

Fig. S7 Variation of the real and imaginary parts of the optical conductivity as a function of the energy ( $h\nu$ ).

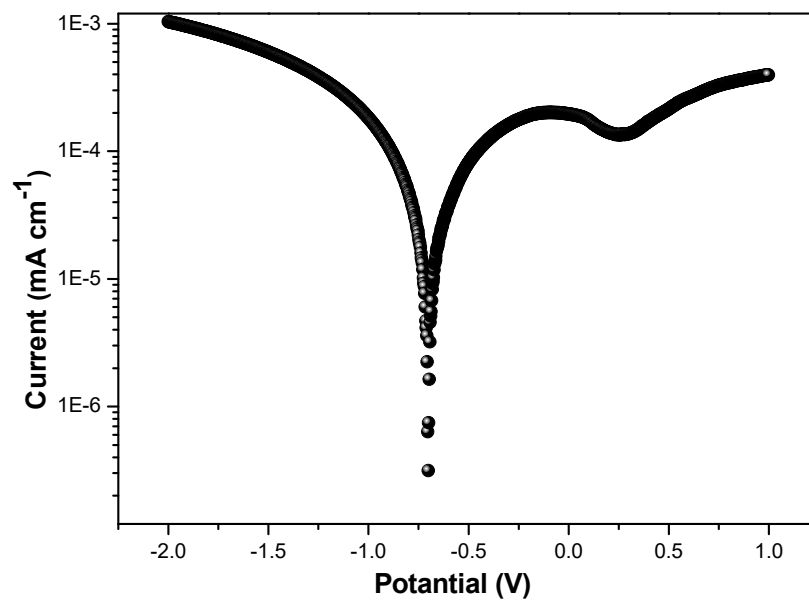

Fig. S8 Semi-logarithmic plot over  $\text{ZnBi}_2\text{O}_4$  electrode.

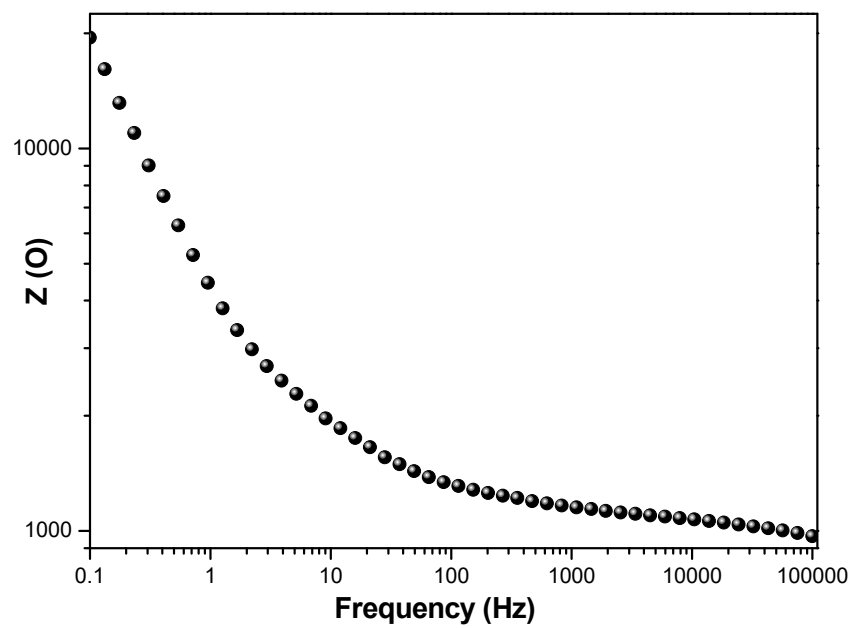

Fig. S9 Bode plan (log  $Z$  vs. log frequency).
